# Supplementary material for: Sociodemographic and health care factors in determining immunization defaulters among preschool children in Petaling District, Selangor: a cross-sectional study in Malaysia
Source: BMC Public Health. 2019 Sep 18;19:1275. doi: 10.1186/s12889-019-7561-z (PMC6751745; doi:10.1186/s12889-019-7561-z)
Supplement: Supplementary file 1 — *Questionnaire, *English language version. (PDF 267 kb) [file 12889_2019_7561_MOESM1_ESM.pdf]

### **Part A: Personal Background Details**

This section is about you and **your youngest or last born child.**

Please mark (✓) in the appropriate box and write your answer in the space provided.

1. Mother's Age, in [date/month/year] : ..... / ..... / .....

2. Ethnicity :

- ☐ Malay
- ☐ Chinese
- ☐ Indian
- ☐ Others (please specify) : .....

3. Religion :

- ☐ Islam
- ☐ Buddha
- ☐ Hindu
- ☐ Christian
- ☐ Others (please specify) : .....

4. Marital Status :

- ☐ Single
- ☐ Married
- ☐ Divorcee
- ☐ Widow

5. Highest Educational Level :

- ☐ Primary school
- ☐ Secondary school
- ☐ Pre-University (contoh / example: STPM, A-Level)
- ☐ Certificate or Diploma
- ☐ Bachelor Degree
- ☐ Postgraduate studies (contoh / example: Masters, PhD)

6. Employment status :

- ☐ Employed
- ☐ Self-employed
- ☐ Unemployed

7. Family members : .....members

8. Number of children, excluding current pregnancy (if any): .....children

9. Youngest or last born child's birth date,  
in [date/month/year]: ..... /..... /.....

10. Youngest or last born child's gender :

- ☐ Male
- ☐ Female

11. Child's birth order : .....order

### **Part B: Your Child's Immunization History**

Please mark (✓) in the appropriate box and write your answer in the space provided.

12. Have you ever immunize your youngest child?

☐ Yes (Please proceed to Question 12)

☐ No (Please proceed to Question 13)

13. Please tick (✓) in the appropriate boxes below, for all the type of immunization that your **YOUNGEST OR LAST BORN CHILD** has received till now. (Use your child's immunization record as reference).

| Type of immunization   | Taken | Didn't Take | If Taken                                   |                                     |
|------------------------|-------|-------------|--------------------------------------------|-------------------------------------|
|                        |       |             | Date of immunization given by clinic staff | Date of immunization taken by child |
| BCG                    |       |             |                                            |                                     |
| Hepatitis B ( Dose1)   |       |             |                                            |                                     |
| Hepatitis B ( Dose 2)  |       |             |                                            |                                     |
| Hepatitis B ( Dose 3)  |       |             |                                            |                                     |
| DTaP/DT (Dose 1)       |       |             |                                            |                                     |
| DTaP/DT (Dose 2)       |       |             |                                            |                                     |
| DTaP/DT (Dose 3)       |       |             |                                            |                                     |
| DTaP/DT (Booster)      |       |             |                                            |                                     |
| Hib (Dose 1)           |       |             |                                            |                                     |
| Hib (Dose 2)           |       |             |                                            |                                     |
| Hib (Dose 3)           |       |             |                                            |                                     |
| Hib (Booster)          |       |             |                                            |                                     |
| IPV/OPV/Polio (Dose 1) |       |             |                                            |                                     |
| IPV/OPV/Polio (Dose 2) |       |             |                                            |                                     |
| IPV/OPV/Polio (Dose 3) |       |             |                                            |                                     |
| IPV/OPV/Polio(Booster) |       |             |                                            |                                     |
| MMR (Dose 1)           |       |             |                                            |                                     |

### **Part C: Immunization Health Facility**

This section is only for those with child who taken at least one immunization.

Please mark (✓) in the appropriate box and write your answer in the space provided.

15. Place of immunization regularly visited for immunization of your child:

(You are allowed to answer more than 1 choice of answer)

- ☐ Government clinic
- ☐ Government hospital
- ☐ Private clinic
- ☐ Private hospital

16. Estimated distance to the regularly visited immunization clinic or hospital to get immunization for your child : .....kilometer (km)

17. Estimated travelling time taken from home to reach the regularly visited immunization clinic or hospital to get immunization for your child : .....minutes

18. Estimated waiting time spent to get your child immunized at the regularly visited immunization clinic or hospital to get immunization for your child : .....minutes

**The End**
